# Supplementary material for: Designing chain-like nickel pyro-vanadate porous spheres as an advanced electrode material for supercapacitors
Source: Royal Society of Chemistry journal article supplement (doi:10.1039/c9qi00137a), 2019-01-01
Supplement: c9qi00137a1.pdf [file c9qi00137a1.pdf]

## Electronic Supplementary Information

### **Designing chain-like nickel pyro-vanadate porous spheres as an advanced electrode material for supercapacitors**

S. Chandra Sekhar,<sup>a</sup> Goli Nagaraju,<sup>a,b</sup> Bhimanaboina Ramulu,<sup>a</sup> D. Narsimulu<sup>a</sup> and Jae Su Yu<sup>a\*</sup>

<sup>a</sup>Department of Electronic Engineering, Institute for Wearable Convergence Electronics, Kyung Hee University, 1732 Deogyong-daero, Gihung-gu, Yongin-si, Gyeonggi-do 17104, Republic of Korea

<sup>b</sup>Department of Chemical Engineering, College of Engineering, Kyung Hee University, 1732 Deogyong-daero, Gihung-gu, Yongin-si, Gyeonggi-do 17104, Republic of Korea.

\*Address correspondence to [jsyu@khu.ac.kr](mailto:jsyu@khu.ac.kr)

Tel: +82-31-201-3820; Fax: +82-31-206-2820

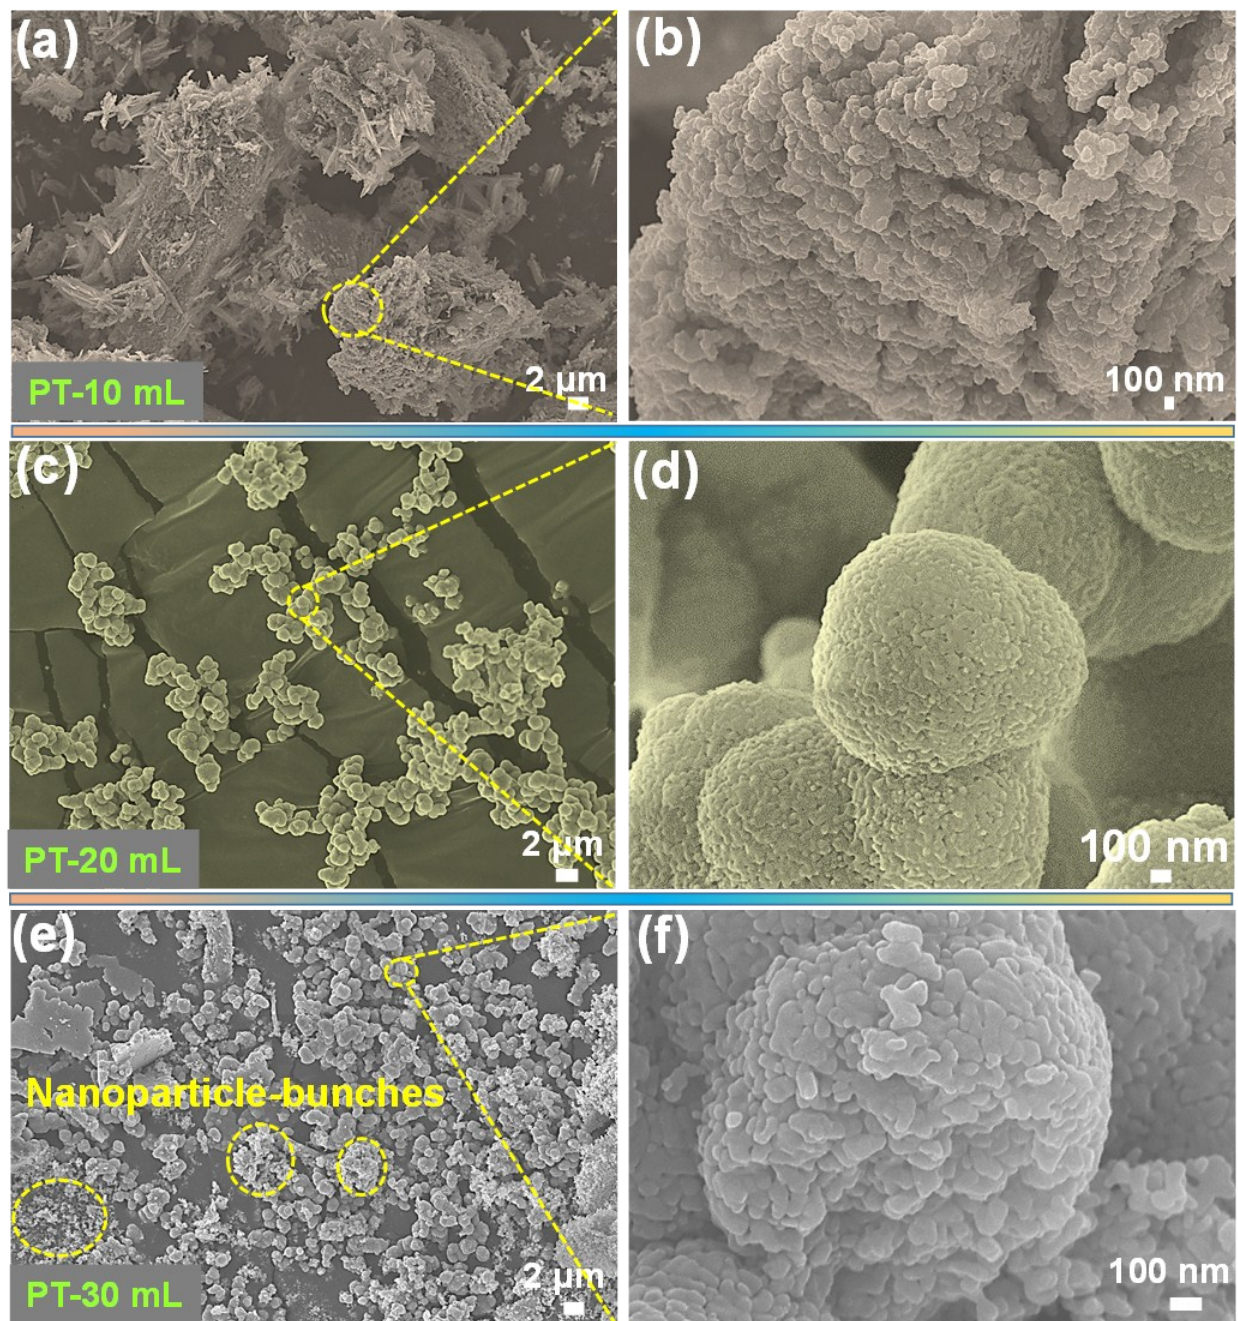

**Fig. S1.** FE-SEM images of NV particles prepared with (a-b) 10 mL, (c-d) 20 mL (optimal condition), and (e-f) 30 mL of PT in growth solution.

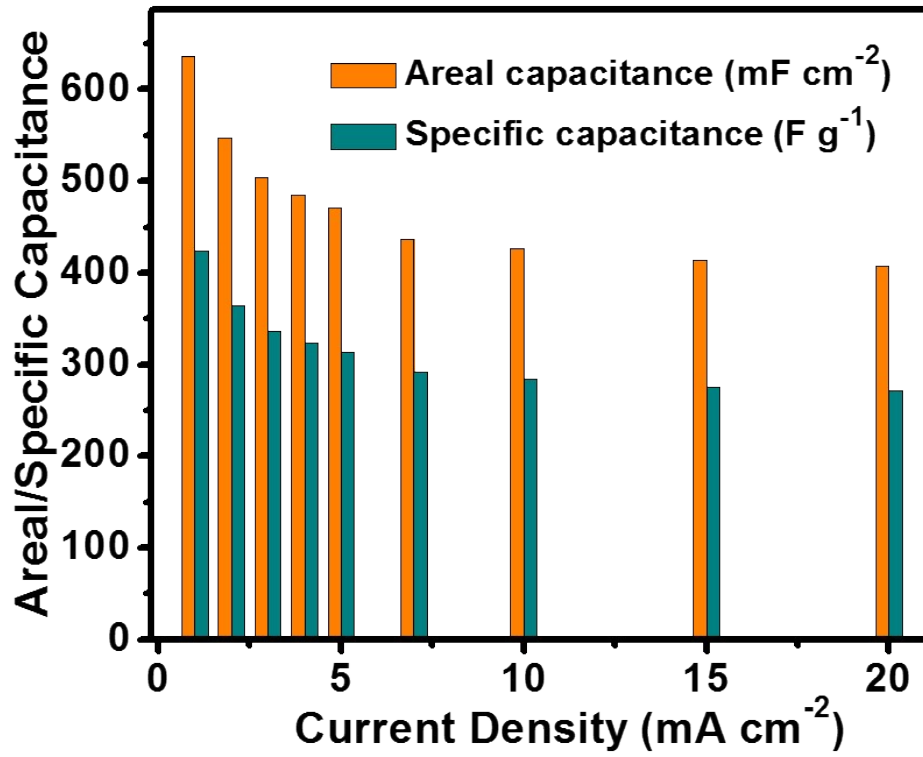

**Fig. S2.** Areal and specific capacitance values of the NV MCs material plotted against different current densities.

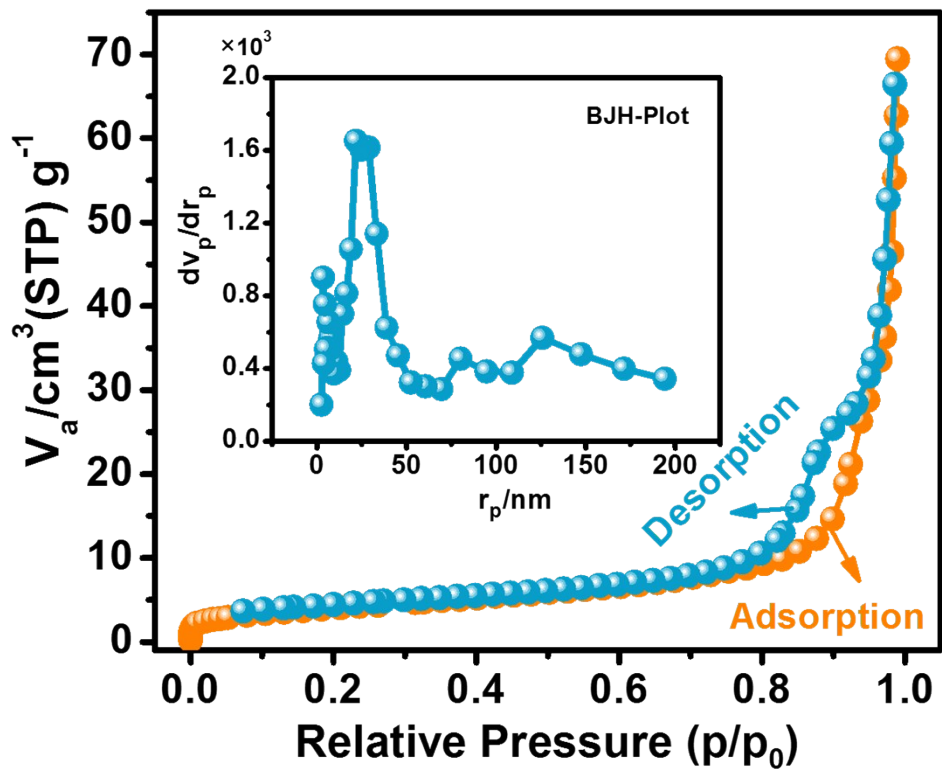

**Fig. S3.** Nitrogen adsorption and desorption isotherms of NV MCs. Inset shows the pore size distribution plot of NV MCs.

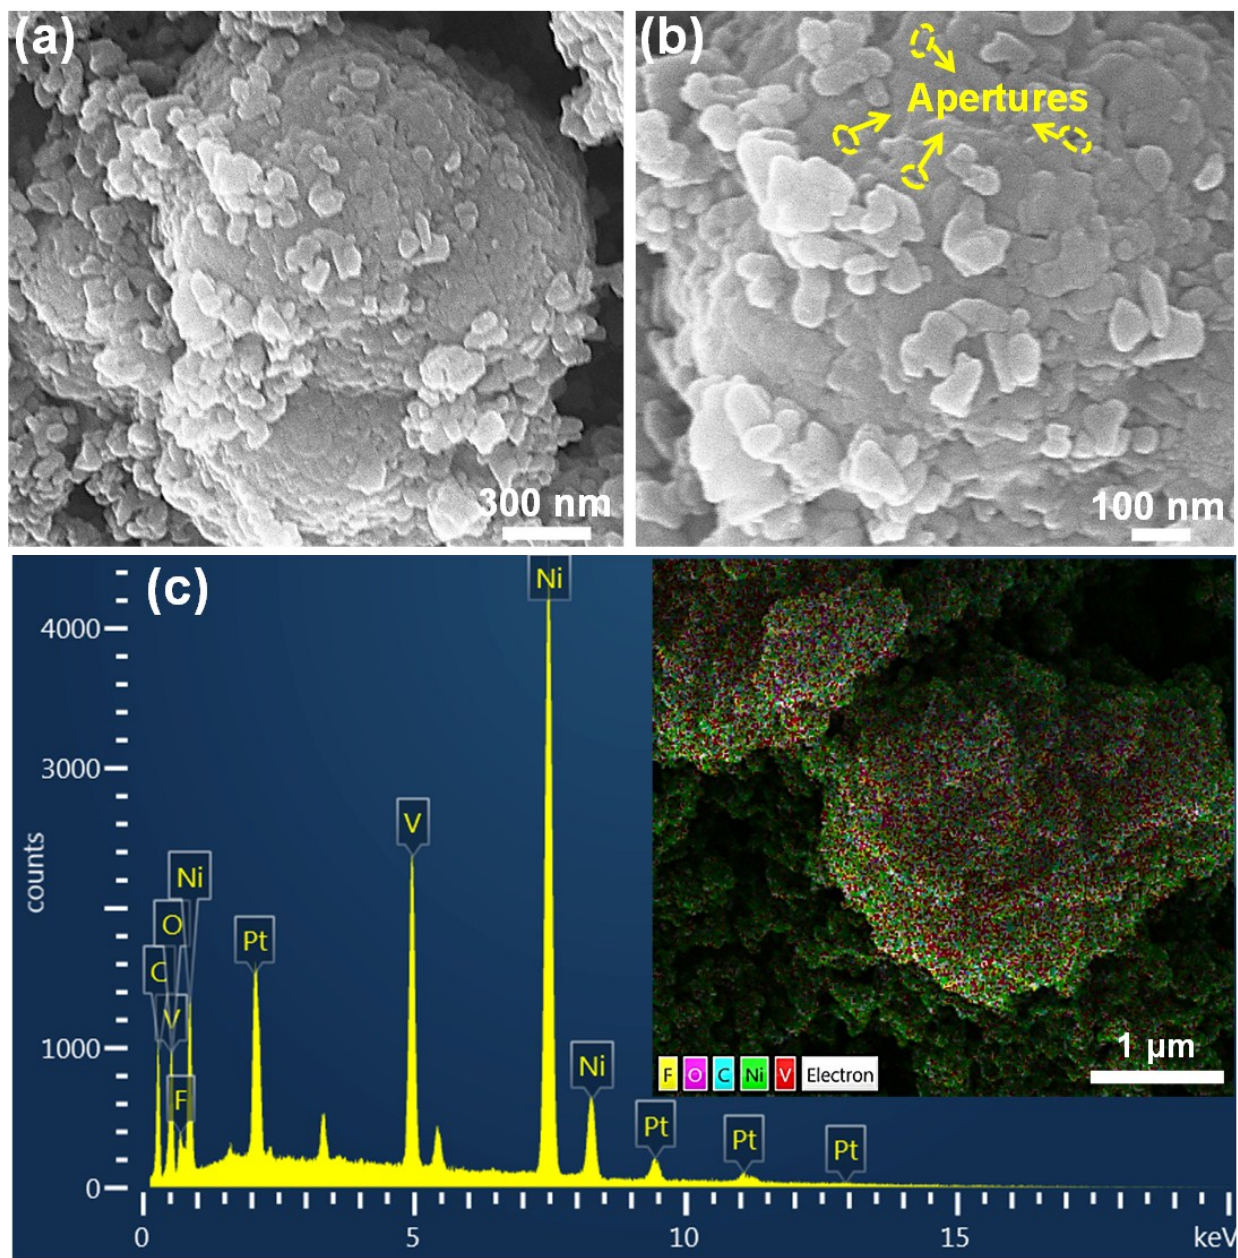

**Fig. S4.** (a-b) FE SEM images and (c) EDX spectrum of the NV particles measured after 2000 charge-discharge cycles. Inset in (c) demonstrates the uniform distribution of Ni, V, and O elements on entire NV particles.

**Table S1.** Comparative areal capacity/specific capacitance performances of the previously reported metal vanadates/bimetallic metal oxide-based materials with our NV MCs electrode material in three-electrode configuration.

| Active material                                                    | Current collector | Electrolyte    | Test condition                                                                            | Electrochemical performance                                                                                                            | Ref.             |
|--------------------------------------------------------------------|-------------------|----------------|-------------------------------------------------------------------------------------------|----------------------------------------------------------------------------------------------------------------------------------------|------------------|
| V <sub>2</sub> O <sub>5</sub> nanosheets                           | Carbon paper      | 1 M KCl        | 1 A g <sup>-1</sup>                                                                       | 70.55 μAh cm <sup>-2</sup>                                                                                                             | S1               |
| Vanadium pentoxide/carbon nanofiber                                | Ni foil           | 6 M KOH        | 1 mA cm <sup>-2</sup>                                                                     | 150 F g <sup>-1</sup>                                                                                                                  | S2               |
| ZnV <sub>2</sub> O <sub>4</sub> hierarchical nanospheres           | Ni foam           | 2 M KOH        | 2 A g <sup>-1</sup>                                                                       | 324 F g <sup>-1</sup>                                                                                                                  | S3               |
| V <sub>0.04</sub> Ni <sub>0.96</sub> O                             | Ti substrate      | 1 M KOH        | 4 A g <sup>-1</sup>                                                                       | 44.3 μAh cm <sup>-2</sup>                                                                                                              | S4               |
| Graphene-NiMoO <sub>4</sub> ·nH <sub>2</sub> O                     | Glassy carbon     | 6 M KOH        | 1.5 mA cm <sup>-2</sup>                                                                   | 13.75 μAh cm <sup>-2</sup>                                                                                                             | S5               |
| Zn <sub>3</sub> V <sub>2</sub> O <sub>8</sub> nanoplatelets        | Ni foam           | 6 M KOH        | 2 A g <sup>-1</sup>                                                                       | 207 F g <sup>-1</sup>                                                                                                                  | S6               |
| CoMoO <sub>4</sub> /C                                              | Ni foil           | 3 M KOH        | 1 mA cm <sup>-2</sup>                                                                     | 54.16 μAh cm <sup>-2</sup>                                                                                                             | S7               |
| CuCo <sub>2</sub> O <sub>4</sub> nanostructures                    | Ni foam           | 3 M KOH        | 2 A g <sup>-1</sup>                                                                       | 280 F g <sup>-1</sup>                                                                                                                  | S8               |
| CoMoO <sub>4</sub> nanorods                                        | Ni foam           | 2 M KOH        | 1.2 mA cm <sup>-2</sup>                                                                   | 70 μAh cm <sup>-2</sup>                                                                                                                | S9               |
| Cu <sub>3</sub> Mo <sub>2</sub> O <sub>9</sub> nanoflakes          | Ni foam           | 1 M KOH        | 1 mA cm <sup>-2</sup>                                                                     | 29.6 μAh cm <sup>-2</sup>                                                                                                              | S10              |
| <b>Ni<sub>2</sub>V<sub>2</sub>O<sub>7</sub> microsphere-chains</b> | <b>Ni foam</b>    | <b>1 M KOH</b> | <b>1 mA cm<sup>-2</sup></b><br><b>3 mA cm<sup>-2</sup></b><br><b>(2 A g<sup>-1</sup>)</b> | <b>77.1 μAh cm<sup>-2</sup></b><br><b>(423.7 F g<sup>-1</sup>)</b><br><b>59 μAh cm<sup>-2</sup></b><br><b>(336.3 F g<sup>-1</sup>)</b> | <b>This work</b> |

## References:

- [S1]. D. H. Nagaraju, Q. Wang, P. Beaujuge and H. N. Alshareef, *J. Mater. Chem. A*, 2014, 2, 17146-17152.
- [S2]. B.-H. Kim, C. H. Kim, K. S. Yang, A. Rahy and D. J. Yang, *Electrochim. Acta*, 2012, 83, 335-340.
- [S3]. F. K. Butt, M. Tahir, C. Cao, F. Idrees, R. Ahmed, W. S. Khan, Z. Ali, N. Mahmood, M. Tanveer, A. Mahmood and I. Aslam, *ACS Appl. Mater. Interfaces*, 2014, 6, 13635-13641.
- [S4]. H. W. Park, B.-K. Na, B. W. Cho, S.-M. Park and K. C. Roh, *Physical Chemistry Chemical Physics*, 2013, 15, 17626-17635.
- [S5]. D. Ghosh, S. Giri and C. K. Das, *Nanoscale*, 2013, 5, 10428-10437.
- [S6]. S. Vijayakumar, S.-H. Lee and K.-S. Ryu, *RSC Adv.*, 2015, 5, 91822-91828.
- [S7]. N. Padmanathan, K. M. Razeeb and S. Selladurai, *Ionics*, 2014, 20, 1323-1334.
- [S8]. A. Pendashteh, M. S. Rahmanifar, R. B. Kaner and M. F. Mousavi, *Chemical Communications*, 2014, 50, 1972-1975.
- [S9]. D. T. Dam, T. Huang and J.-M. Lee, *Sustainable Energy & Fuels*, 2017, 1, 324-335.
- [S10]. G. Nagaraju, S. Chandra Sekhar, B. Ramulu and J. S. Yu, *Applied Surface Science*, 2019, 471, 795-802.
